# Supplementary material for: The Open State Selectivity of the Bean Seed VDAC Depends on Stigmasterol and Ion Concentration
Source: MDPI journal article supplement (doi:10.3390/ijms22063034), 2021-03-16
Supplement: s1 [file s1]

Figure S2: Channel conductance

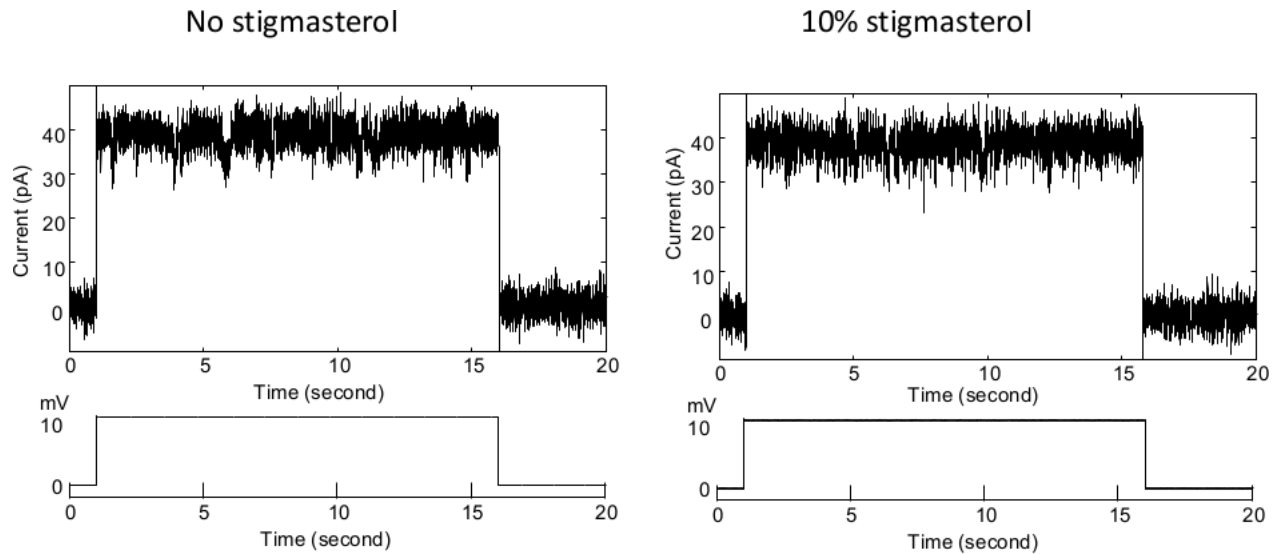

Effect of stigmasterol on the PcVDAC conductance. To assess the conductance ( $G$ ), the current amplitude ( $I$ ) flowing through the channel in response to 10 mV voltage pulse ( $V$ ). The conductance was calculated using Ohm law ( $G = I/V$ ).

The figure displays two independent single-channel experiments corresponding to a single PcVDAC reconstituted in a planar lipid bilayer. The membrane was either free of stigmasterol (left) or doped with 10% stigmasterol (right). Each compartment was filled with 1M KCl buffered at pH 7.5 with 10mM HEPES-KOH.
